# Supplementary material
Source: PubMed Central journal article supplement (PMC3469775)
Supplement: NIHMS410202-supplement-Supplementary_Information.pdf [file NIHMS410202-supplement-Supplementary_Information.pdf]

# SUPPORTING INFORMATION

## Novel Aromatase Inhibitors By Structure-Guided Design

*Debashis Ghosh, Jessica Lo, Daniel Morton, Damien Valette, Jingle Xi, Jennifer Griswold, Susan Hubbell, Chinaza Egbuta, Wenhua Jiang, Jing An, Huw M. L. Davie*

### Contents

1. Detailed inhibition data and individual dose response curves for all the C6-substituted androgens and the controls: Table S1
2. Detailed antiproliferation data and individual dose response curves for the new inhibitors and the controls: Table S2
3. Summary of X-ray data collection and refinement results: Table S3
4. Unbiased difference ( $|F_{obs}| - |F_{cal}|$ ) electron density maps for EXM, **4** and **5**. Also shown are unbiased electron densities for the deleted side chain atoms: Figure S1 a, b, c
5. Docking validation results: Figure S2
6. Docking of compound **5** to other potential targets: Figure S3
7. Summary of results from docking experiments: RMSD and free-energy of ligand-binding: Table S4

**Table S1.** Detailed inhibition data and individual dose response curves

| Compound   | Percent Inhibition |            |            |             |            |            | Dose-Response Curve                                                                  | IC <sub>50</sub> (nM) | 95% Confidence Interval (nM) |
|------------|--------------------|------------|------------|-------------|------------|------------|--------------------------------------------------------------------------------------|-----------------------|------------------------------|
|            | 10μM               | 9.1μM      | 1μM        | 500nM       | 100nM      | 10nM       |                                                                                      |                       |                              |
|            | Avg (SD)           | Avg (SD)   | Avg (SD)   | Avg (SD)    | Avg (SD)   | Avg (SD)   |                                                                                      |                       |                              |
| 2          | 65.7 (2.4)         |            | 17.2 (0.2) |             |            |            | 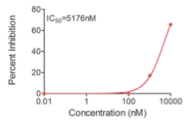   | 5200                  | 4700 to 5500                 |
| 3          | 41.6 (5.3)         |            | 20.9 (1.3) |             |            |            |    | 18100                 | 13100 to 25200               |
| 4          | 95.0 (0.3)         |            | 63.0 (5.5) | 76.0 (1.7)  | 49.9 (2.7) | 21.6 (5.3) |    | 112.3                 | 78.2 to 161.3                |
| 5          |                    | 99.1 (0.1) |            | 91.9 (0.2)  | 83.1 (4.9) | 46.4 (0.4) |    | 11.8                  | 9.3 to 14.9                  |
| 6          |                    | 99.2 (0.1) |            | 83.1 (4.9)  | 53.9 (3.6) |            |    | 83                    | 74.5 to 93.9                 |
| 7          |                    | 97.0 (0.1) |            | 65.3 (2.3)  | 40.2 (3.1) |            |   | 181.1                 | 164.0 to 200.0               |
| 8          |                    | 75.0 (1.6) | 31.5 (3.7) | 31.2 (0.8)  | 5.0 (7.4)  |            |  | 2180                  | 1750 to 2710                 |
| 9          |                    |            | 96.0 (0.4) |             | 84.5 (1.7) | 32.8 (4.2) |  | 20                    | 18.1 to 22.0                 |
| Exemestane |                    |            |            | 83.2 (1.3)  | 61.8 (5.2) |            |  | 50.1                  | 40.9 to 61.4                 |
| Formestane |                    |            |            | 79.9 (1.5)  | 50.3 (2.9) |            |  | 48.6                  | 33.6 to 71.1                 |
| Letrozole  |                    |            |            | 95.1 (0.02) | 83.9 (0.6) | 50.5 (1.3) |  | 9.9                   | 9.3 to 10.5                  |

**Table S2.** Detailed anti-proliferation data and individual dose response curves

| Compound   | Cell Proliferation (% of Control) |             |             |             |             |             |            |            | Dose-Response Curve                                                                   | EC <sub>50</sub> (nM) | 95% Confidence Interval(nM) |
|------------|-----------------------------------|-------------|-------------|-------------|-------------|-------------|------------|------------|---------------------------------------------------------------------------------------|-----------------------|-----------------------------|
|            | 1000nM                            | 100nM       | 10nM        | 1nM         | 0.1nM       | 0.01nM      | 0.005nM    | 0.001nM    |                                                                                       |                       |                             |
|            | Avg (SD)                          | Avg (SD)    | Avg (SD)    | Avg (SD)    | Avg (SD)    | Avg (SD)    | Avg (SD)   | Avg (SD)   |                                                                                       |                       |                             |
| 4          |                                   | 2.9 (2.6)   | 18.1 (1.7)  | 60.6 (11.3) | 89.1 (6.5)  | 104.5 (2.7) |            |            | 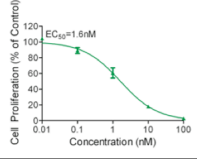   | 1.7                   | 1.2 to 2.2                  |
| 5          |                                   |             | 0.0 (5.83)  | 8.7 (8.6)   | 35.8 (12.0) | 60.1 (9.7)  | 87.0 (6.3) | 99.4 (7.1) |    | 0.03                  | 0.02 to 0.06                |
| 6          |                                   | 4.3 (5.9)   | 23.3 (7.8)  | 79.6 (12.3) | 93.9 (3.5)  | 99.7 (5.2)  |            |            |    | 3.4                   | 2.4 to 4.7                  |
| 7          |                                   | 12.5 (12.9) | 30.6 (5.4)  | 84.1 (8.5)  | 95.7 (4.2)  | 100.4 (8.3) |            |            |   | 5.4                   | 3.2 to 7.3                  |
| 8          | 0.15 (7.2)                        | 13.9 (4.7)  | 64.0 (8.4)  | 81.2 (8.1)  | 102.0 (5.5) | 106.6 (2.4) |            |            |  | 15.7                  | 10.1 to 22.9                |
| 9          |                                   | 0.0 (1.7)   | 2.0 (10.0)  | 25.2 (9.6)  | 76.0 (1.7)  | 83.1 (4.9)  |            |            |  | 0.3                   | 0.2 to 0.4                  |
| Exemestane |                                   | 9.4 (6.0)   | 29.5 (15.9) | 78.5 (4.0)  | 103.8 (1.0) | 108.3 (1.6) |            |            |  | 5.6                   | 2.7 to 6.5                  |
| Letrozole  |                                   |             | 0.0 (3.2)   | 0.0 (2.2)   | 14.2 (11.5) | 33.8 (14.1) | 55.8 (3.4) | 63.8 (9.8) |  | 0.004                 | 0.003 to 0.007              |

| <b>Table S3.</b> Summary of X-ray data collection and refinement results |                               |                           |                           |                           |
|--------------------------------------------------------------------------|-------------------------------|---------------------------|---------------------------|---------------------------|
| Protein                                                                  | Androstenedione (ASD) complex | Exemestane (EXM) complex  | Compound 4 complex        | Compound 5 complex        |
| PDB ID code                                                              | 3S79                          | 3S7S                      | 4GL5                      | 4GL7                      |
| <b>Data collection</b>                                                   |                               |                           |                           |                           |
| Space group                                                              | P3 <sub>2</sub> 21            | P3 <sub>2</sub> 21        | P3 <sub>2</sub> 21        | P3 <sub>2</sub> 21        |
| Cell dimensions<br><i>a, b, c</i> (Å)                                    | 140.22, 140.22,<br>119.27     | 140.63, 140.63,<br>119.02 | 140.33, 140.33,<br>118.73 | 141.45, 141.45,<br>118.85 |
| $\alpha, \beta, \gamma$ (°)                                              | 90.0, 90.0, 120.0             | 90.0, 90.0, 120.0         | 90.0, 90.0, 120.0         | 90.0, 90.0, 120.0         |
| Resolution range (Å)                                                     | 50.0 - 2.747                  | 50.0 - 3.208              | 50.0 - 3.481              | 50.0 - 3.900              |
| $R_{\text{sym}}$ or $R_{\text{merge}}$                                   | 0.077 (0.790)*                | 0.110 (0.850)             | 0.154 (0.816)             | 0.114 (0.793)             |
| $I / \sigma I$                                                           | 25.42 (1.73)                  | 23.93 (2.07)              | 14.10 (2.34)              | 16.72 (1.25)              |
| Completeness (%)                                                         | 99.5 (100.0)                  | 100.0 (100.0)             | 91.5 (95.0)               | 99.5 (100.0)              |
| Redundancy                                                               | 6.0 (6.1)                     | 11.1 (10.9)               | 3.8 (3.9)                 | 4.6 (4.6)                 |
| Number of crystals used                                                  | 1                             | 1                         | 1                         | 1                         |
| <b>Refinement</b>                                                        |                               |                           |                           |                           |
| Resolution (Å)                                                           | 2.747                         | 3.208                     | 3.481                     | 3.900                     |
| Unique reflections                                                       | 33618                         | 21353                     | 17289                     | 12126                     |
| $R_{\text{work}} / R_{\text{free}}$                                      | 0.219/0.237                   | 0.221/0.256               | 0.210/0.260               | 0.214/0.254               |
| No. atoms                                                                |                               |                           |                           |                           |
| Protein                                                                  | 3668                          | 3668                      | 3658                      | 3658                      |
| Heme/Steroid                                                             | 43/21                         | 43/22                     | 43/26                     | 43/27                     |
| Water/ion                                                                | 37/15                         | 0                         | 0                         | 0                         |
| $B$ -factors (Å <sup>2</sup> )                                           |                               |                           |                           |                           |
| Wilson (overall)                                                         | 83.2                          | 106.4                     | -                         | -                         |
| Protein                                                                  | 69.1                          | 96.4                      | 91.2                      | 147.5                     |
| Heme/Steroid                                                             | 46/54                         | 62/74                     | 60/75                     | 97/116                    |
| Water/ion                                                                | 76.9                          | -                         | -                         | -                         |
| R.m.s. deviations                                                        |                               |                           |                           |                           |
| Bond lengths (Å)                                                         | 0.008                         | 0.009                     | 0.009                     | 0.012                     |
| Bond angles (°)                                                          | 1.261                         | 1.227                     | 1.311                     | 1.474                     |
| Overall coordinate error                                                 |                               |                           |                           |                           |
| From $R_{\text{free}}$ (Å)                                               | 0.22                          | 0.35                      | 0.47                      | 0.56                      |
| max likelihood (Å)                                                       | 0.18                          | 0.27                      | 0.33                      | 0.41                      |
| <b>Structure validation</b>                                              |                               |                           |                           |                           |
| $\Phi/\Psi$ plot <sup>1</sup>                                            |                               |                           |                           |                           |
| Favored region                                                           | 430 (95.6%)                   | 419 (93.1%)               | 390 (86.7%)               | 391 (86.9%)               |
| Allowed region                                                           | 20 (4.4%)                     | 27 (6.0%)                 | 53 (11.8%)                | 52 (11.6%)                |
| Outlier region                                                           | 0 (0.0%)                      | 4 (0.9%)                  | 7 (1.6%)                  | 7 (1.6%)                  |

\*Numbers in parenthesis are for the highest resolution shells

**Figure S1. Unbiased difference electron density ( $F_{obs}-F_{cal}$ ) maps, calculated before inclusion of the inhibitors in the models.** Shown are the refined atomic models of the aromatase complexes with (a) EXM: 3.21Å resolution contoured at 4.5 $\sigma$ . Also shown in blue is the difference electron density in the absence of C6 methylidene carbon, contoured at 2.0 $\sigma$ , representing the missing atom. (b) 2-butynyloxy derivative **4**: 3.48Å at 4.0 $\sigma$ . Shown in magenta is the difference electron density in the absence of the side chain atoms, contoured at 3.5 $\sigma$ , representing the missing atoms. (c) 2-pentynyloxy derivative **5**: 3.90Å at 2.7 $\sigma$ . Shown in magenta is the difference electron density in the absence of the side chain atoms, contoured at 2.5 $\sigma$ , representing the missing atoms.

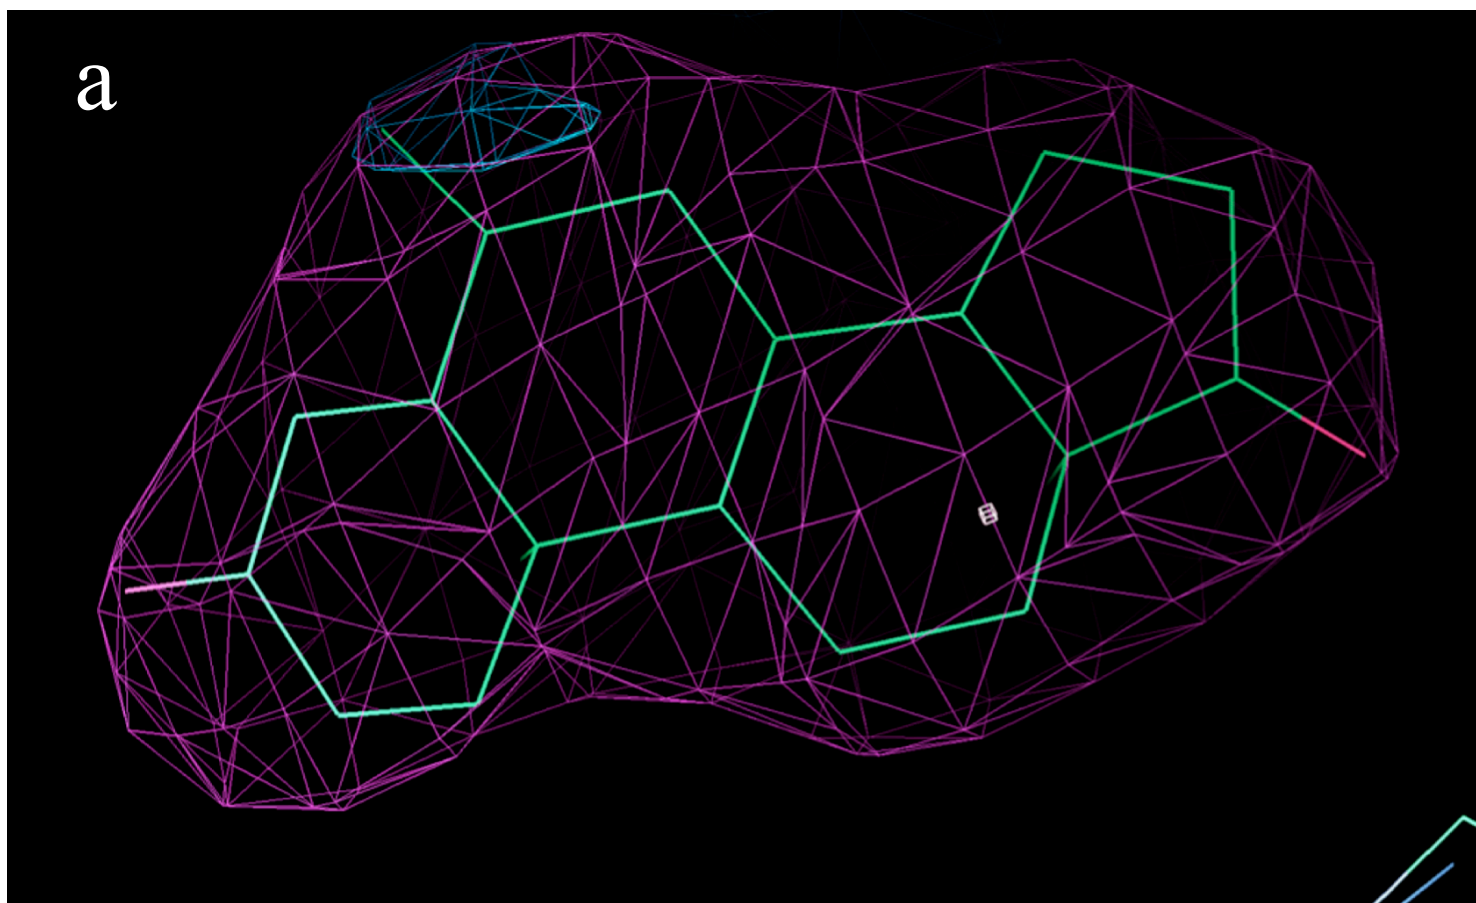

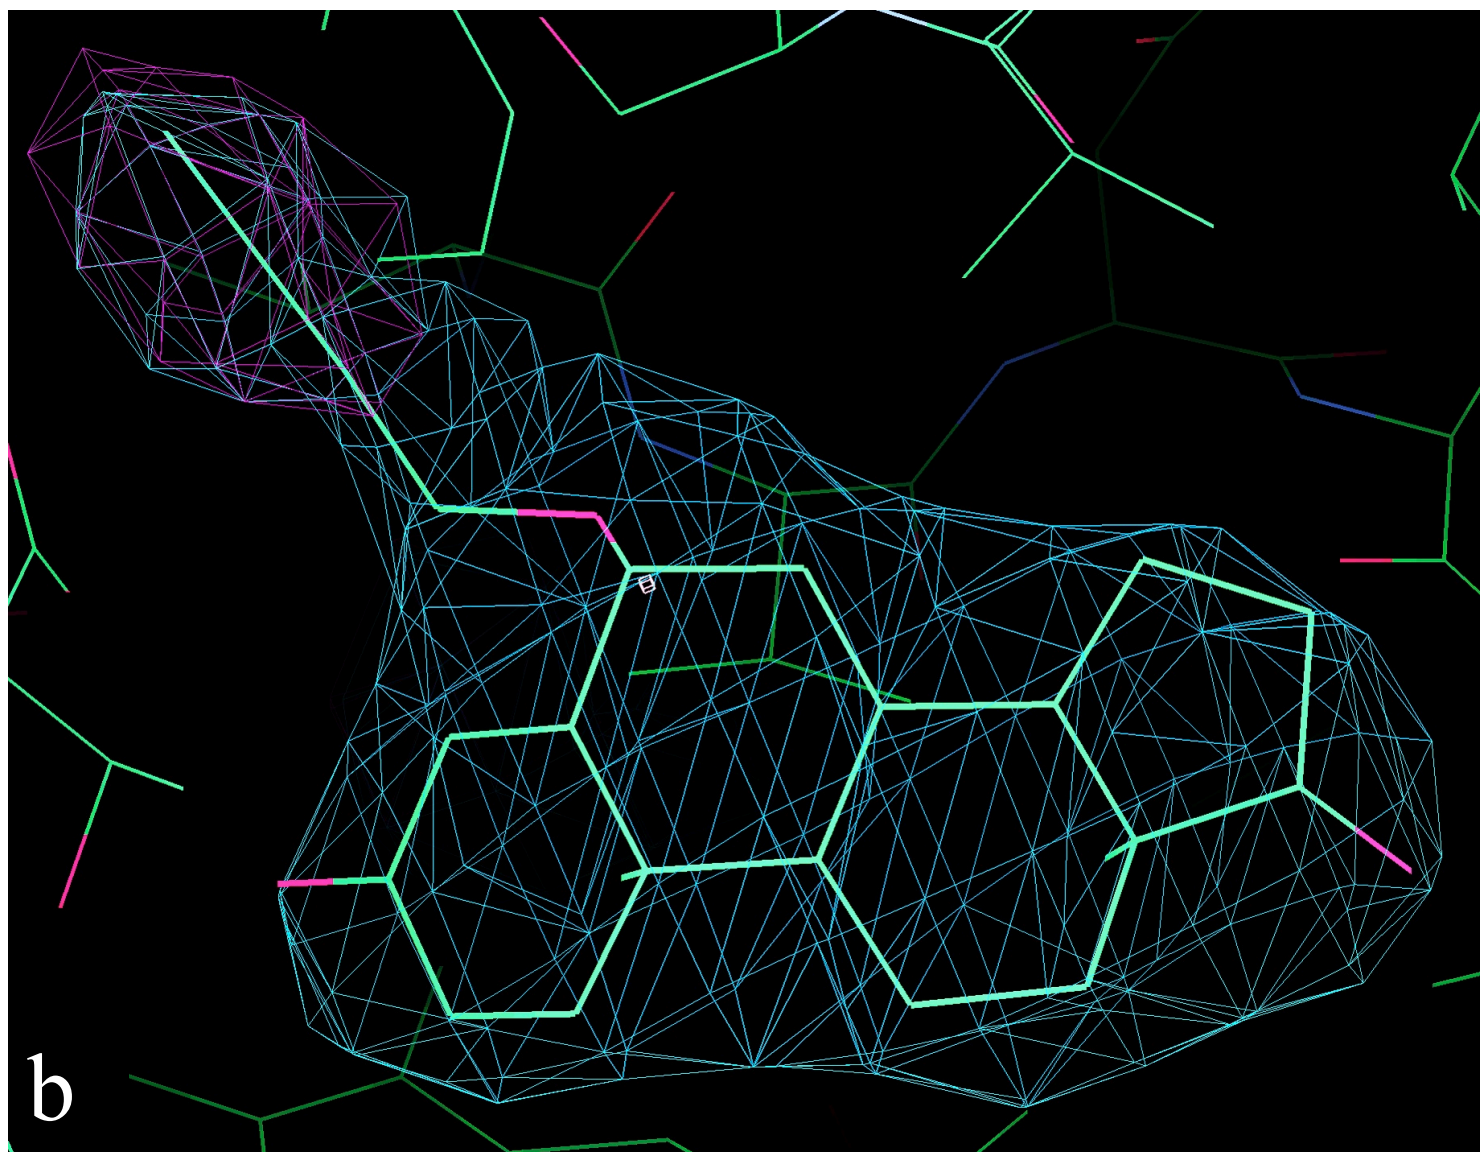

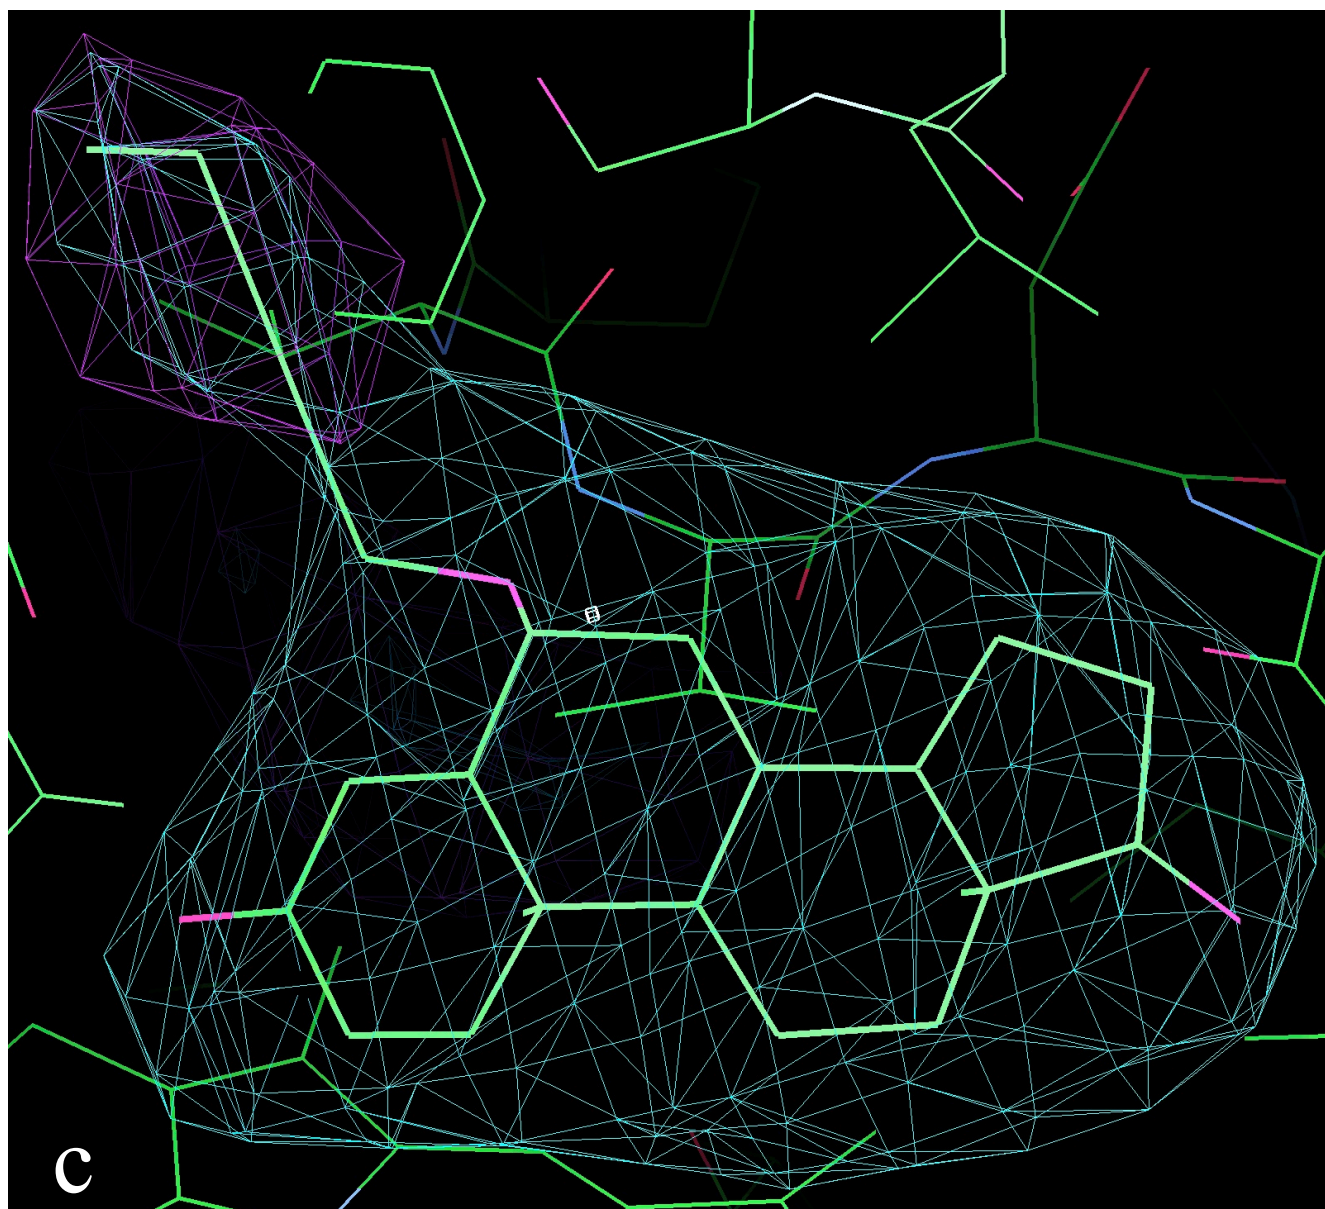

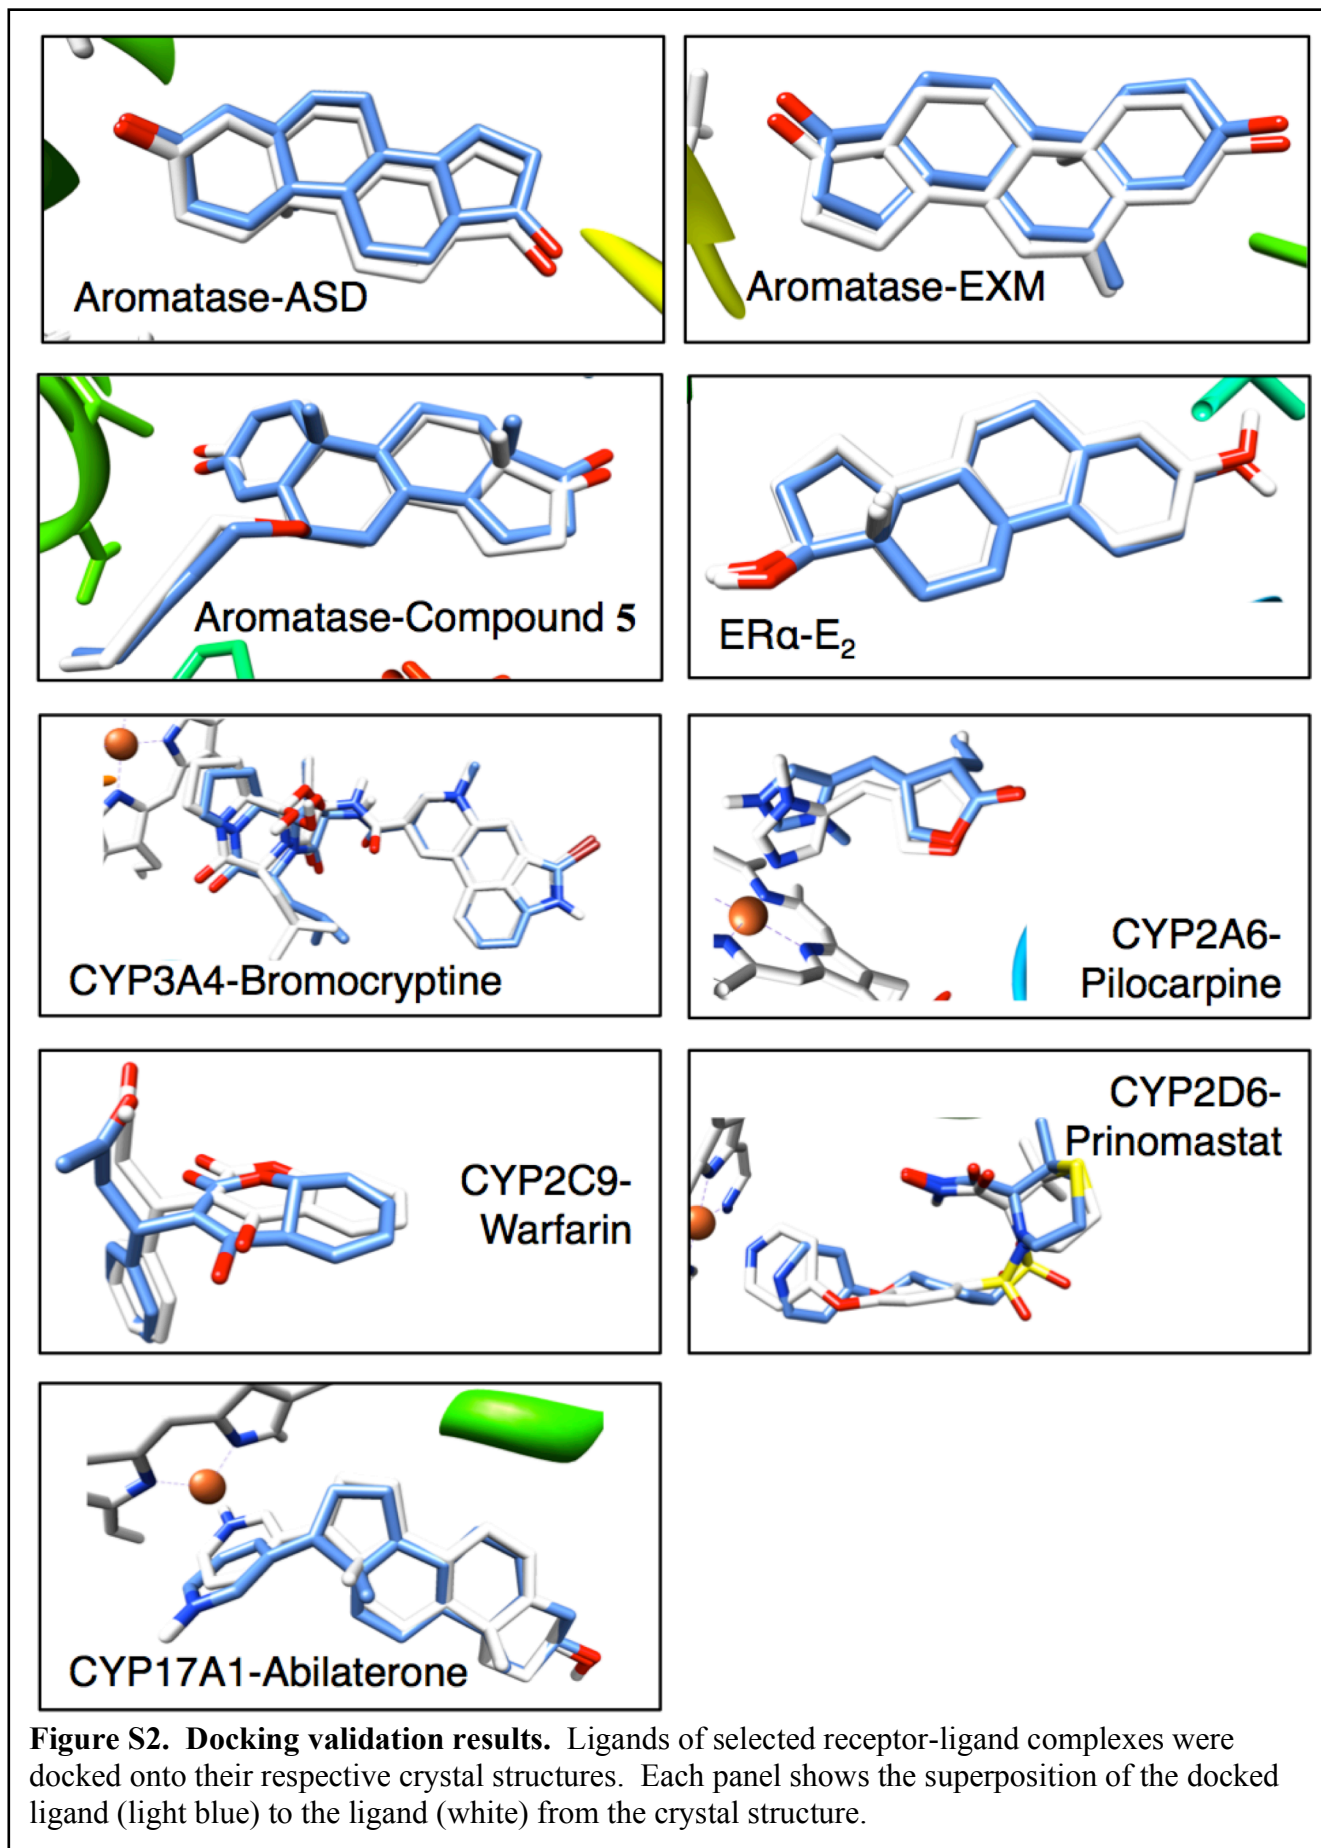



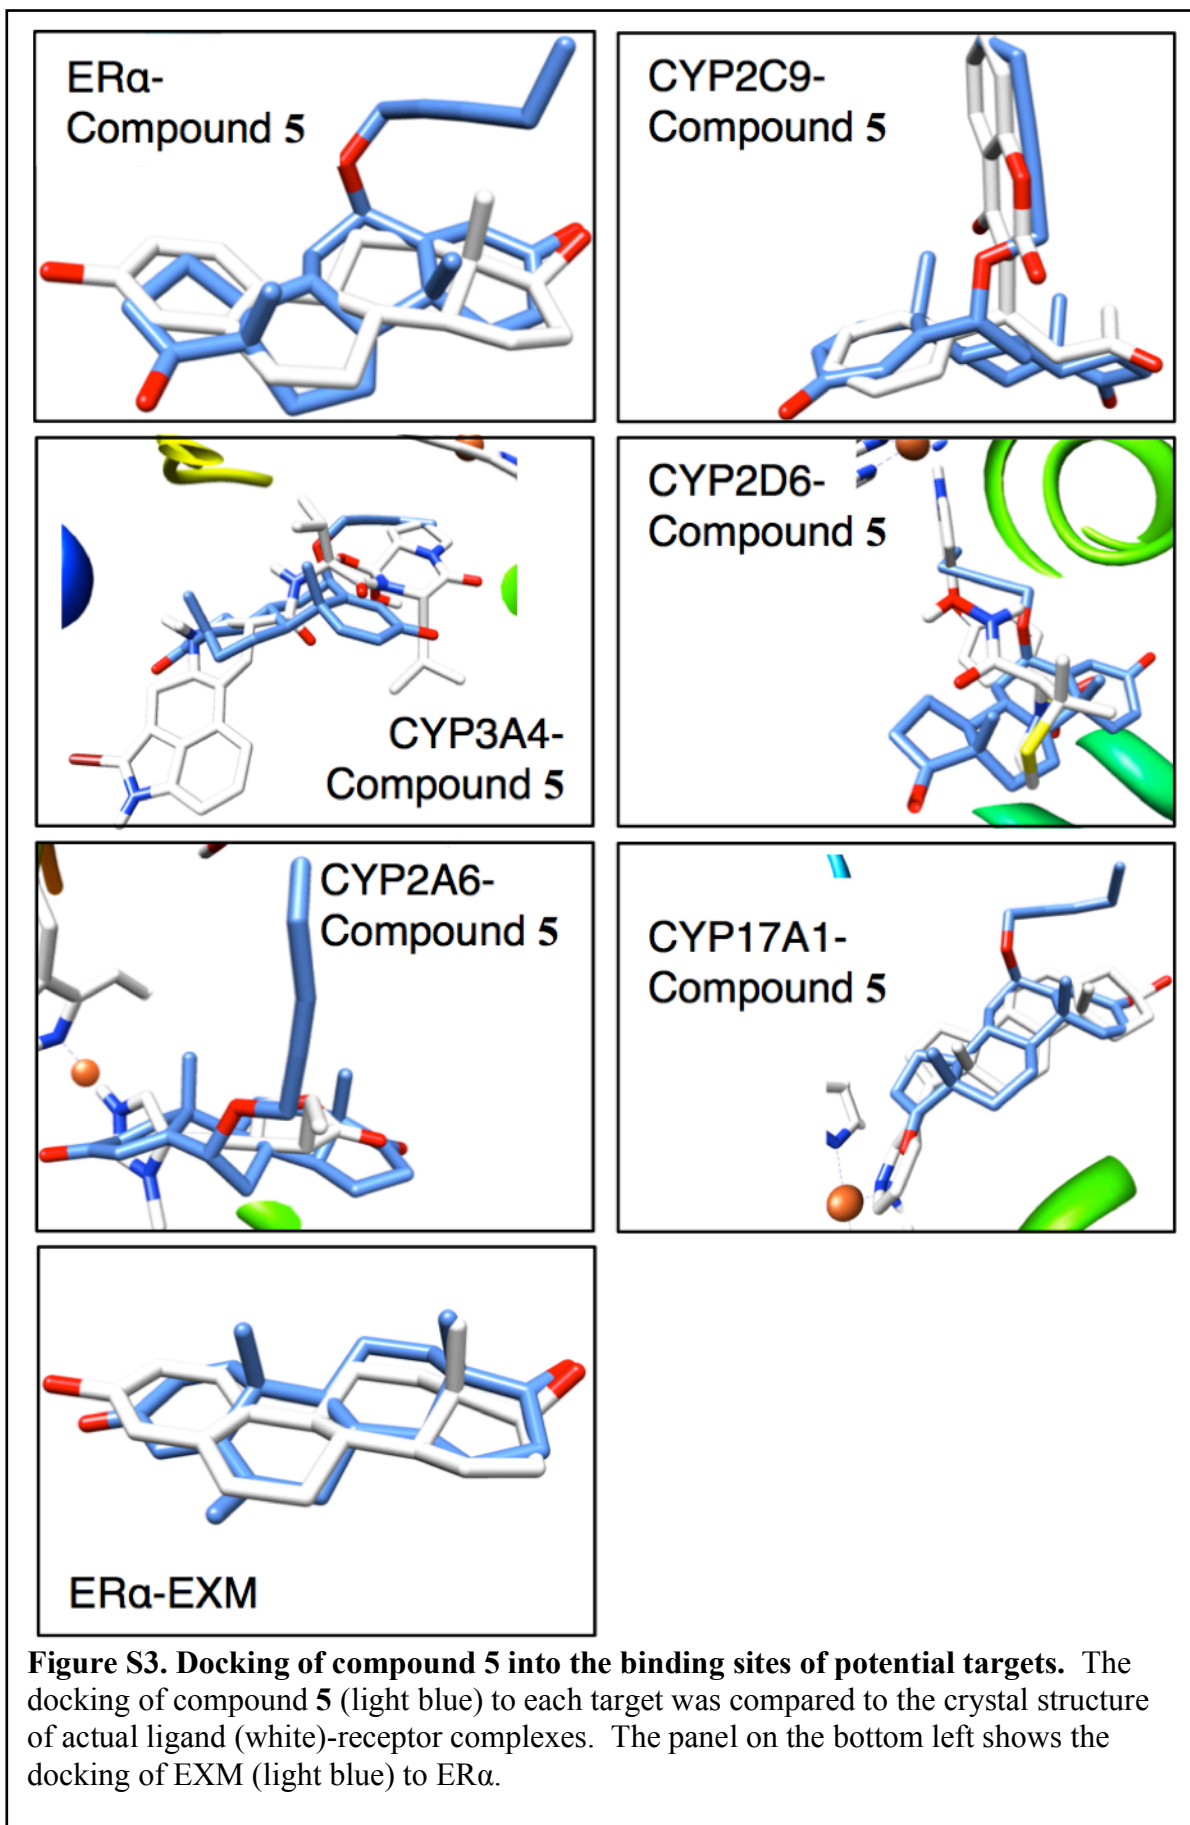

**Table S4.** Summary of results from docking experiments: root mean square deviation (RMSD) of each ligand from the crystal structure and free-energy of ligand-binding

| Receptor             | Ligand        | RMSD of docked native ligand Å | Scoring function (Free energy of ligand binding, kcal/mole) | Docking to receptor with pharmacophore (receptor features specific for ligand recognition) query |
|----------------------|---------------|--------------------------------|-------------------------------------------------------------|--------------------------------------------------------------------------------------------------|
| Aromatase<br>CYP19A1 | ASD           | 0.5                            | -21.1                                                       | Best poses replicate the crystal structures.                                                     |
|                      | EXM           | 0.6                            | -16.0                                                       |                                                                                                  |
|                      | <b>5</b>      | 0.5                            | -16.1                                                       |                                                                                                  |
| ER $\alpha$          | E2            | 0.4                            | -25.2                                                       | No conformations passed pharmacophore filters.<br><br>No poses generated.                        |
|                      | EXM           | 0.7                            | 7.2                                                         |                                                                                                  |
|                      | <b>5</b>      | N/A                            | 58.0                                                        |                                                                                                  |
| CYP3A4               | Bromocryptine | 1.0                            | -34.0                                                       |                                                                                                  |
|                      | <b>5</b>      | N/A                            | -19.3                                                       |                                                                                                  |
| CYP2A6               | Pilocarpine   | 1.0                            | 10.9                                                        |                                                                                                  |
|                      | <b>5</b>      | N/A                            | 186.4                                                       |                                                                                                  |
| CYP2C9               | S-Warfarin    | 1.1                            | -11.6                                                       |                                                                                                  |
|                      | <b>5</b>      | N/A                            | 64.9                                                        |                                                                                                  |
| CYP2D6               | Prinomastat   | 1.0                            | -10.8                                                       |                                                                                                  |
|                      | <b>5</b>      | N/A                            | -0.1                                                        |                                                                                                  |
| CP17A1               | Abilaterone   | 0.7                            | -11.5                                                       |                                                                                                  |
|                      | <b>5</b>      | N/A                            | 7.1                                                         |                                                                                                  |

**Reference:**

1. Lovell, S. C.; Davis, I. W.; Arendall, W. B., 3rd; de Bakker, P. I.; Word, J. M.; Prisant, M. G.; Richardson, J. S.; Richardson, D. C., Structure validation by Calpha geometry: phi,psi and Cbeta deviation. *Proteins* **2003**, *50*, 437-450.
